# Supplementary material
Source: Elsevier journal article supplement (https://www.sciencedirect.com/science/article/pii/S2254887421001065)
Supplement: mmc1 [file S2254887421001065:mmc1.docx]

**Supplementary material**

**Supplementary table 1.** Diagnoses of subjects with premature acute cardiovascular disease attended to in the Hospital Universitario Miguel Servet (Zaragoza, Spain) between October 1, 2017 and September 30, 2018 (n=367).

| Type of event | n (%) |
| --- | --- |
| ST-Elevation Myocardial Infarction (STEMI) | 145 (55.8) |
| Non-ST Elevation Myocardial Infarction (NSTEMI) | 48 (13.1) |
| Coronary artery dissection | 3 (0.8) |
| Coronary vasospasm | 1 (0.3) |
| Subarachnoid hemorrhage-brain aneurysm complication | 50 (13.6) |
| Cerebral arteriovenous fistula | 4 (1.1) |
| Cerebral vasospasm | 2 (0.5) |
| Carotid artery dissection | 1 (0.3) |
| Atherothrombotic stroke | 48 (13.1) |
| Cardioembolic stroke | 12 (3.3) |
| Lacunar stroke | 7 (1.9) |
| Transitory ischemic attack | 7 (1.9) |
| Peripheral artery disease | 18 (4.9) |
| Aortic dissection/aneurysm | 13 (3.5) |
| Carotid artery stenosis without cerebral infarction | 8 (2.2) |

**Supplementary figure 1.** Flow chart for selecting subjects included in the study.

**520 hospitalizations for premature cardiovascular disease according to ICD codes**


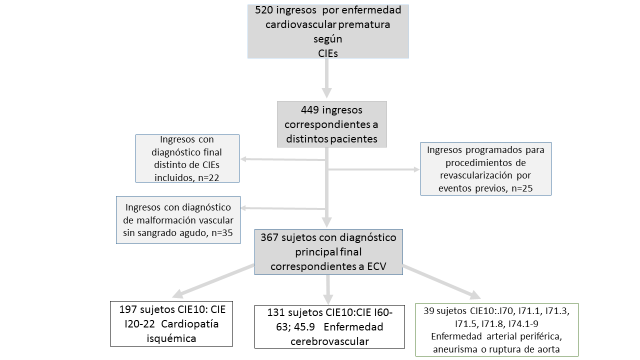


Hospitalizations with a diagnosis of vascular malformation without acute bleeding, n=35

Hospitalizations with a final diagnosis different from the ICD codes included, n=22

39 subjects with ICD 10: I70, I71.1, I71.3, I71.5, I71.8, I74.1-9 Peripheral artery disease, aneurysm, or aortic rupture

131 subjects with ICD 10: ICD I60-63; 45.9 Cerebrovascular disease

197 subjects with ICD 10: ICD I20-22 Ischemic heart disease

**367 subjects with a final principal diagnosis of a CVE**

Scheduled hospitalizations for revascularization procedures due to previous events, n=25

**449 hospitalizations corresponding to different patients**
